# Supplementary material for: Aqueous Humor Dynamics of the Brown-Norway Rat
Source: PubMed Central journal article supplement — Invest Ophthalmol Vis Sci. 2018 May;59(6):2529–37. doi: 10.1167/iovs.17-22915 (PMC5967599; doi:10.1167/iovs.17-22915), 2018-05
Supplement: iovs-59-06-15_s01.pdf [file iovs-59-06-15_s01.pdf]

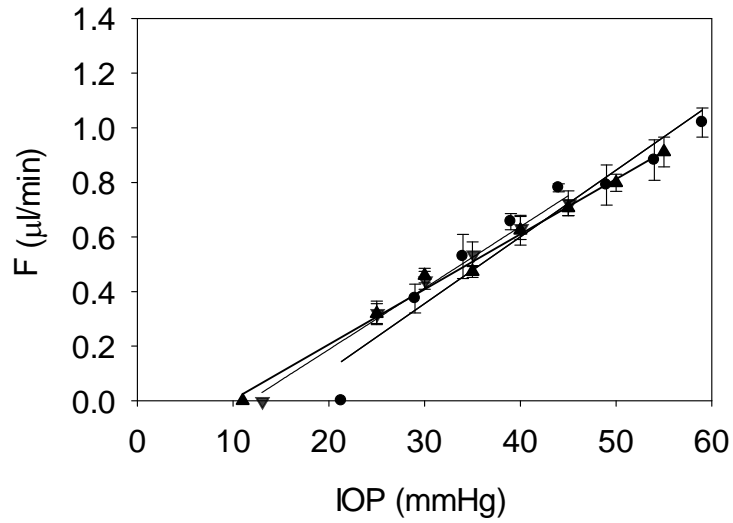

*Supplemental Figure S1.* Pressure-flow data for 3 experiments in which rats were only administered ketamine-xylazine IV. Resting IOP, conventional outflow facility, and y-intercept were not significantly different from those of rats given paralytics, mydriatics, or other treatments ( $p = 0.621, 0.314, 0.766$ , respectively).
