# Supplementary material for: Aqueous Humor Dynamics of the Brown-Norway Rat
Source: PubMed Central journal article supplement — Invest Ophthalmol Vis Sci. 2018 May;59(6):2529–37. doi: 10.1167/iovs.17-22915 (PMC5967599; doi:10.1167/iovs.17-22915), 2018-05
Supplement: iovs-59-06-15_s02.pdf [file iovs-59-06-15_s02.pdf]

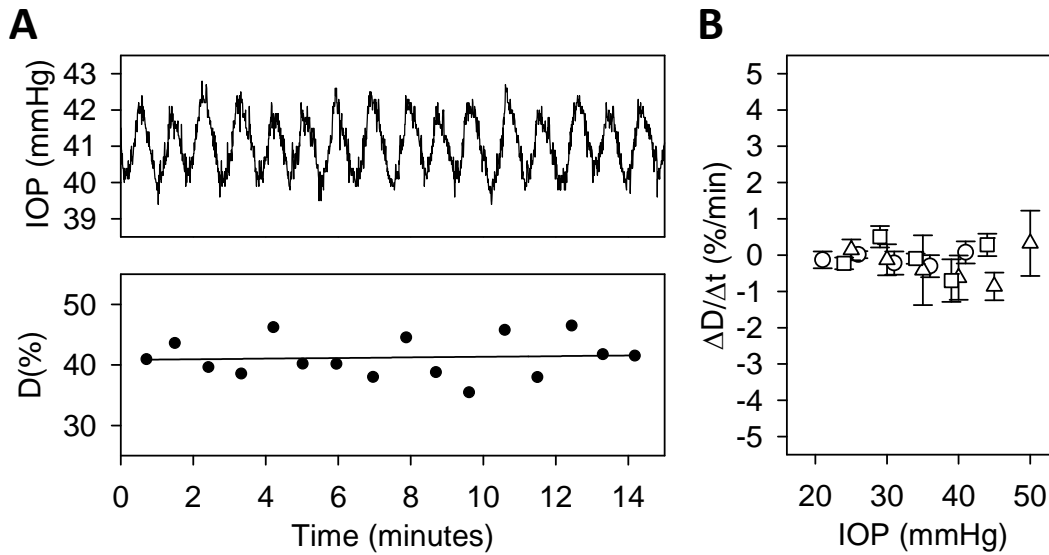

*Supplemental Figure S2.* (A) IOP and duty-cycle records from a mCP experiment. Shown are 16 pump cycles after the set point of 41 mmHg was reached (top) and duty cycle  $D$  measured from the pump on and off duration of each cycle (bottom). Solid line is a regression of the duty cycle data (Pearson correlation coefficient = 0.07,  $p = 0.81$ ). (B) Slope of the regression line as a function of IOP level for 3 rats. Bars give standard error of the slope. The slope of 0 indicates that net flow did not change over time and that duty cycle measurements can be averaged to give  $F$  for each IOP setting.
